# Supplementary material for: CXCR4 Recognition by L- and D-Peptides Containing the Full-Length V3 Loop of HIV-1 gp120
Source: MDPI journal article supplement (doi:10.3390/v15051084), 2023-04-28
Supplement: s1 [file s1]

## Results of Peptides synthesis

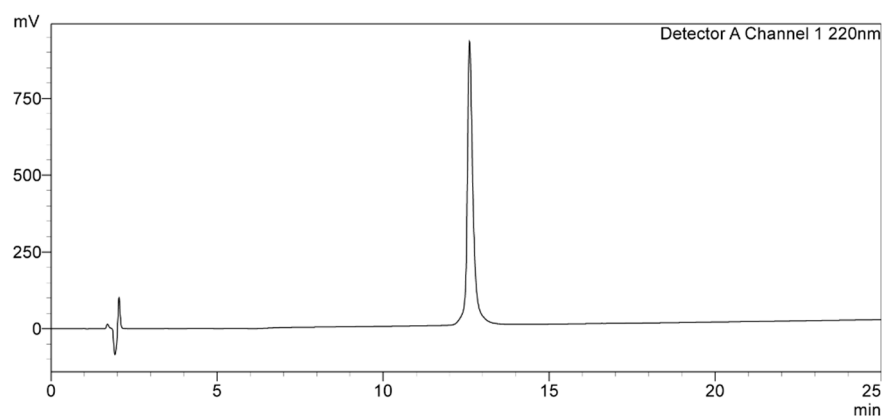

**Figure S1.** RP-HPLC analyzed the purity of synthesized L-V3 peptide.

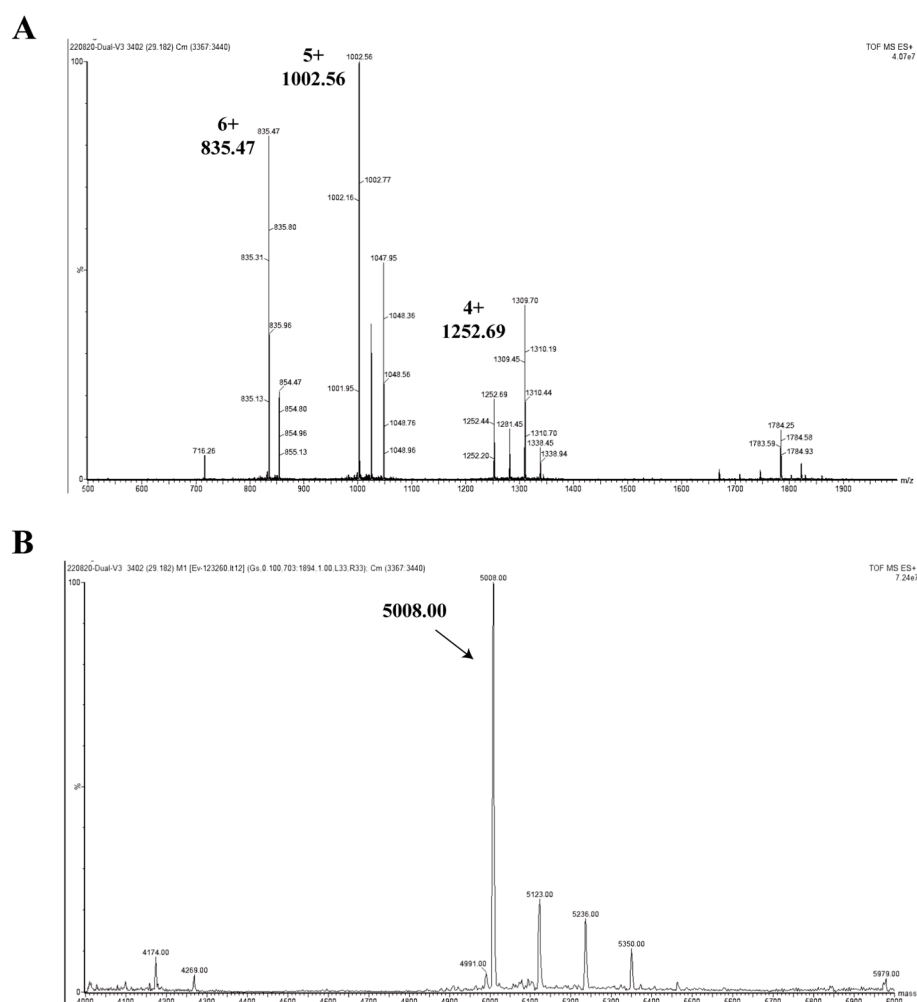

**Figure S2.** ESI-MS determined the molecular weight of synthesized L-V3 peptide. (A) Positive mode ESI-MS for L-V3 peptide, (B) deconvoluted ESI-MS spectra of L-V3 peptide.

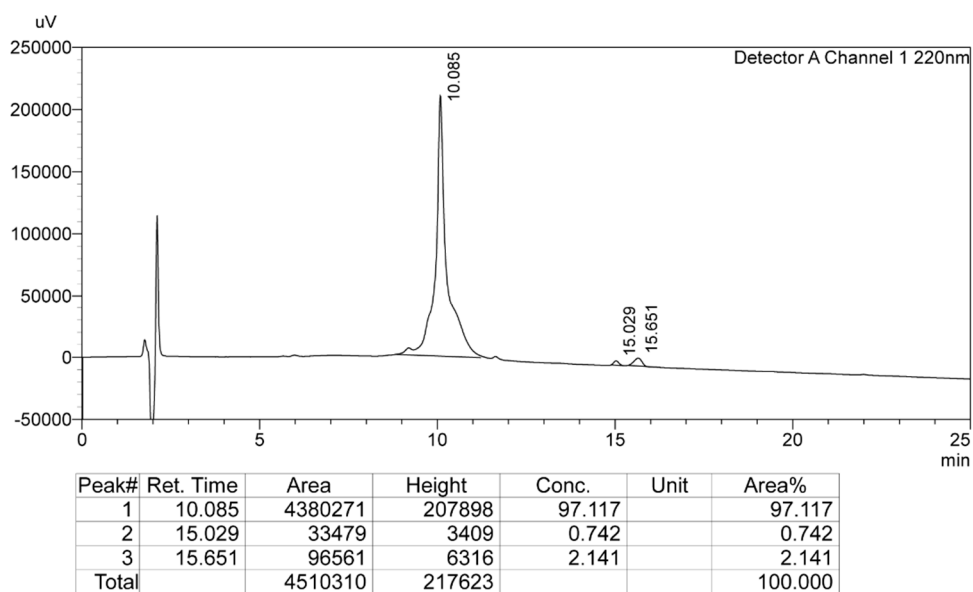

**Figure S3. RP-HPLC analyzed the purity of synthesized D-V3 peptide.**

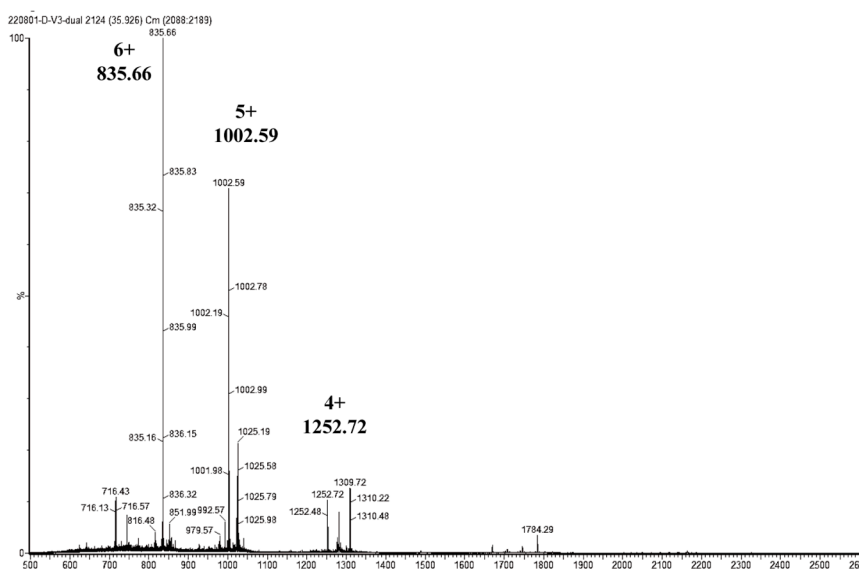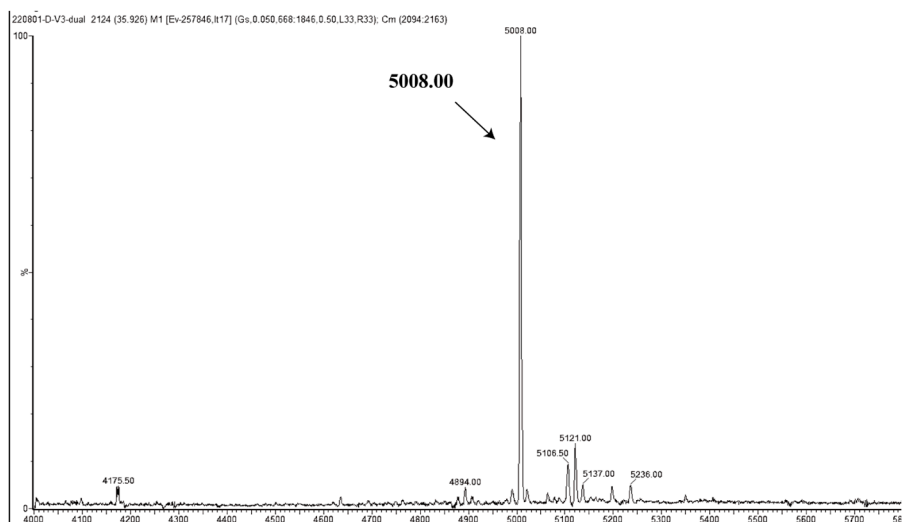

**Figure S4. ESI-MS determined the molecular weight of synthesized D-V3 peptide.** (A) Positive mode ESI-MS for D-V3 peptide, (B) deconvoluted ESI-MS spectra of D-V3 peptide.
